# Supplementary material
Source: publisher figshare collection journal article supplement (https://acs.figshare.com/ndownloader/files/13528865)
Supplement: Supplementary file 1 [file 13528865]

## Supporting Information

### **Differential Metal Ion Sensing By An Antipyrine Derivative In Aqueous And $\beta$ -Cyclodextrin Media: Selectivity–Tuning By $\beta$ -Cyclodextrin**

Govindaraj Tamil Selvan,<sup>1</sup> Sumathi Poomalai,<sup>2</sup> Sivaraj Ramasamy,<sup>1</sup> Paulraj Mosae Selvakumar,<sup>1</sup> Israel V Muthu Vijayan Enoch,<sup>1,3\*</sup> Sara Gracia Lanas,<sup>4</sup> Andrea Melchior<sup>4\*</sup>

<sup>1</sup>Chemistry Research Lab, Department of Chemistry, <sup>3</sup>Nanotoxicology Research Lab, Department of Nanoscience, Karunya Institute of Technology & Sciences, Coimbatore 641114, Tamil Nadu, India.

<sup>2</sup>Department of Chemistry, Muthayammal College of Arts and Science, Namakkal District, Tamil Nadu, India.

<sup>3</sup>University of Udine, Polytechnic Department of Engineering, Chemistry Laboratories via del Cotonificio 108, 33100 Udine, Italy.

\*Corresponding authors, E-mail addresses: drisraelenoch@gmail.com (IVMVE); andrea.melchior@uniud.it (AM).

#### **Table of contents**

| <b>Figures</b> | <b>Caption</b>                                                                                                                                                                                                                          | <b>Page No.</b> |
|----------------|-----------------------------------------------------------------------------------------------------------------------------------------------------------------------------------------------------------------------------------------|-----------------|
| Figure S1      | <sup>1</sup> H NMR Spectrum of Compound <b>1</b>                                                                                                                                                                                        | S-2             |
| Figure S2      | <sup>13</sup> C NMR Spectrum of Compound <b>1</b>                                                                                                                                                                                       | S-3             |
| Figure S3      | Mass Spectrum of Compound <b>1</b>                                                                                                                                                                                                      | S-4             |
| Figure S4      | (A) Benesi–Hildebrand plot of <b>1</b> –VO <sup>2+</sup> 1:1 complex. (B) Jobs plot, of the <b>1</b> –VO <sup>2+</sup> complex formation, made using fluorescence intensities                                                           | S-5             |
| Figure S5      | (A) Fluorescence spectra used for the determination of detection limit of Compound <b>1</b> with VO <sup>2+</sup> Metal ion sensing and (B) Compound <b>1</b> in $\beta$ -CD solution with Al <sup>3+</sup> Metal ion sensing.          | S-6             |
| Figure S6      | Structure of the metal complexes of Compound <b>1</b> in open and $\beta$ -CD-bound forms.                                                                                                                                              | S-7             |
| Figure S7      | (A) Benesi–Hildebrand plot of Compound <b>1</b> in $\beta$ -CD solution assuming 1:1 binding with Al <sup>3+</sup> ion pH =7.4 (B) Jobs plot, of the <b>1</b> –Al <sup>3+</sup> complex formation, made using fluorescence intensities. | S-8             |
| Figure S8      | <sup>1</sup> H NMR Spectrum of Compound <b>1</b> , <b>1</b> – $\beta$ -CD, and <b>1</b> – $\beta$ -CD with Al <sup>3+</sup> ion.                                                                                                        | S-9             |

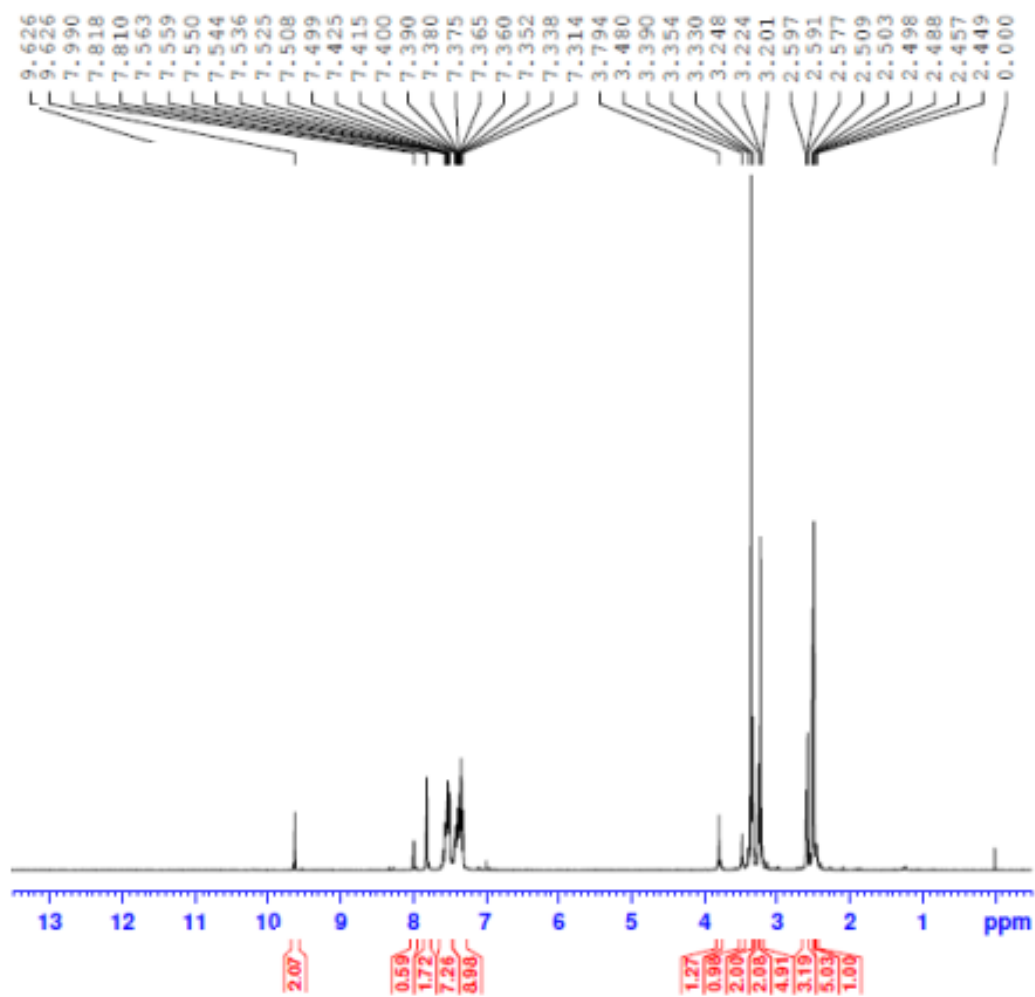

Figure S1. <sup>1</sup>H NMR Spectrum of Compound 1

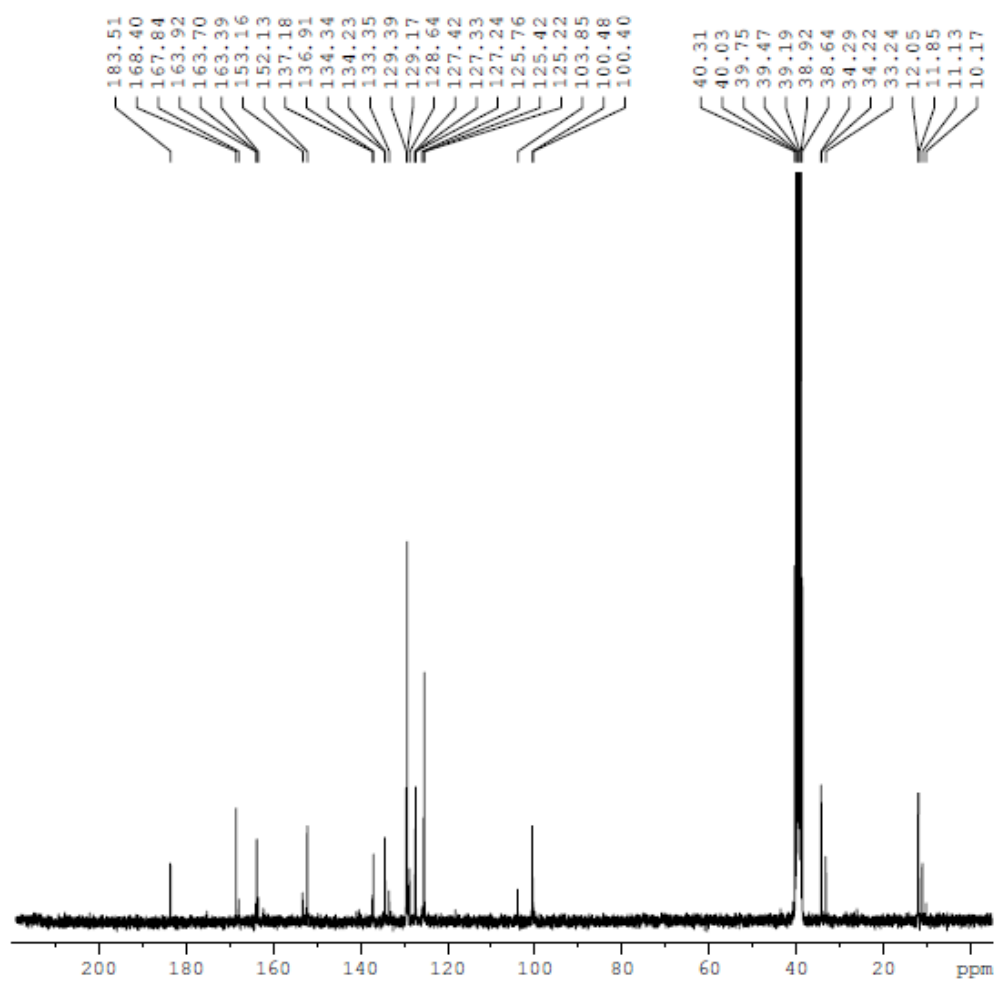

**Figure S2.** <sup>13</sup>C NMR Spectrum of Compound 1

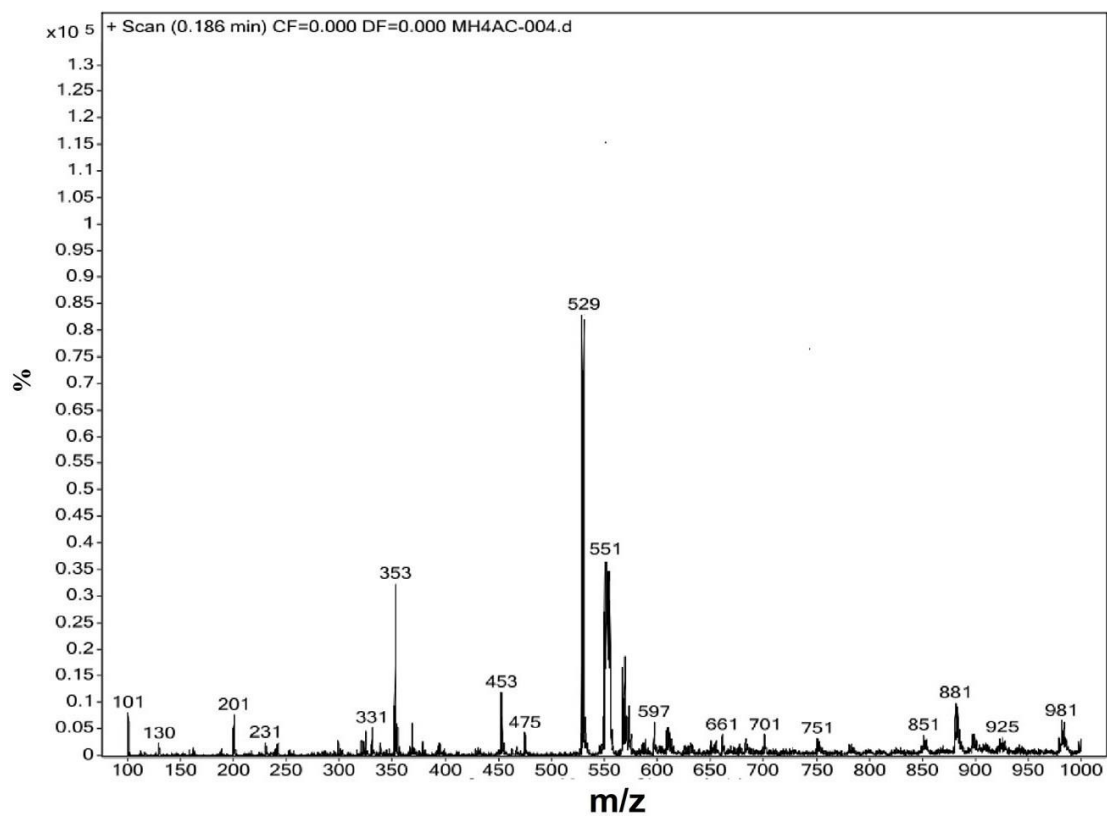

**Figure S3.** Mass Spectrum of Compound 1

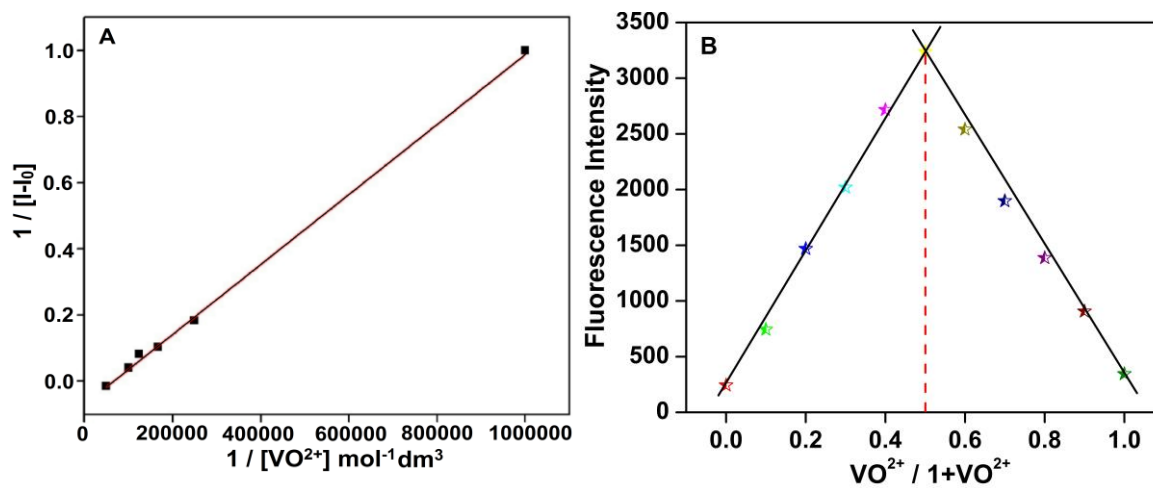

**Figure S4.** (A) Benesi–Hildebrand plot of **1**–VO<sup>2+</sup> 1:1 complex. (B) Jobs plot, of the **1**–VO<sup>2+</sup> complex formation, made using fluorescence intensities.

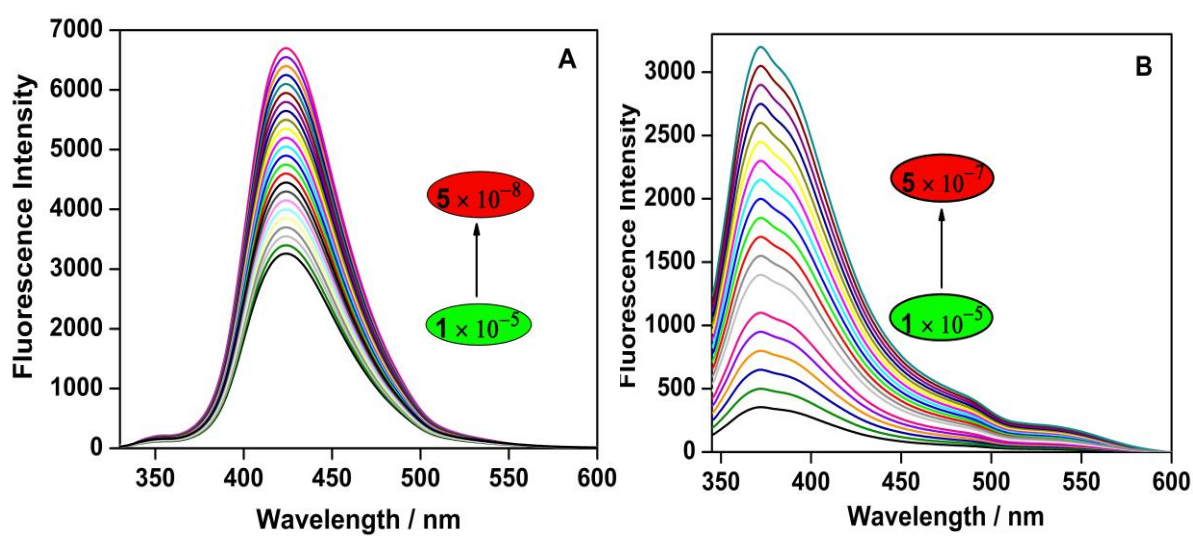

**Figure S5.** (A) Fluorescence spectra used for the determination of detection limit of Compound **1** with  $\text{VO}^{2+}$  Metal ion sensing (B) Compound **1** in  $\beta\text{-CD}$  solution with  $\text{Al}^{3+}$  Metal ion sensing.

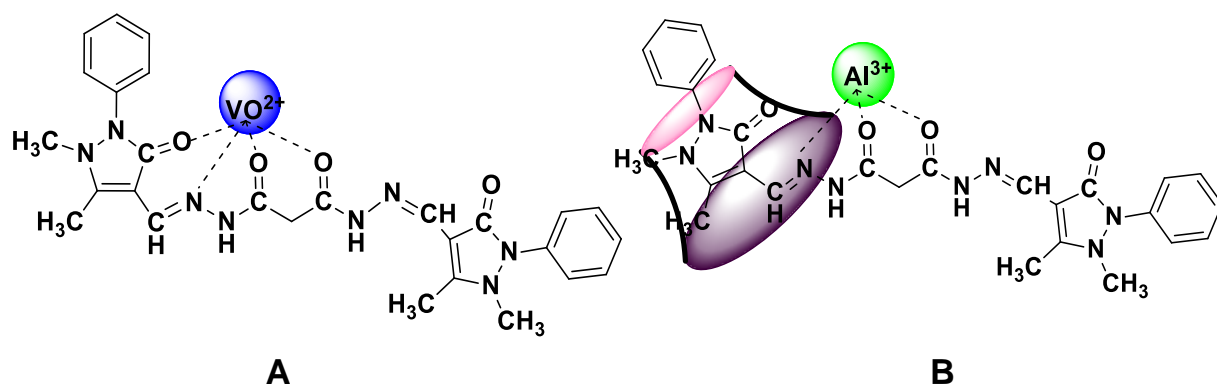

**Figure S6.** Structure of the metal complexes of Compound **1** in open and  $\beta$ -CD-bound forms.

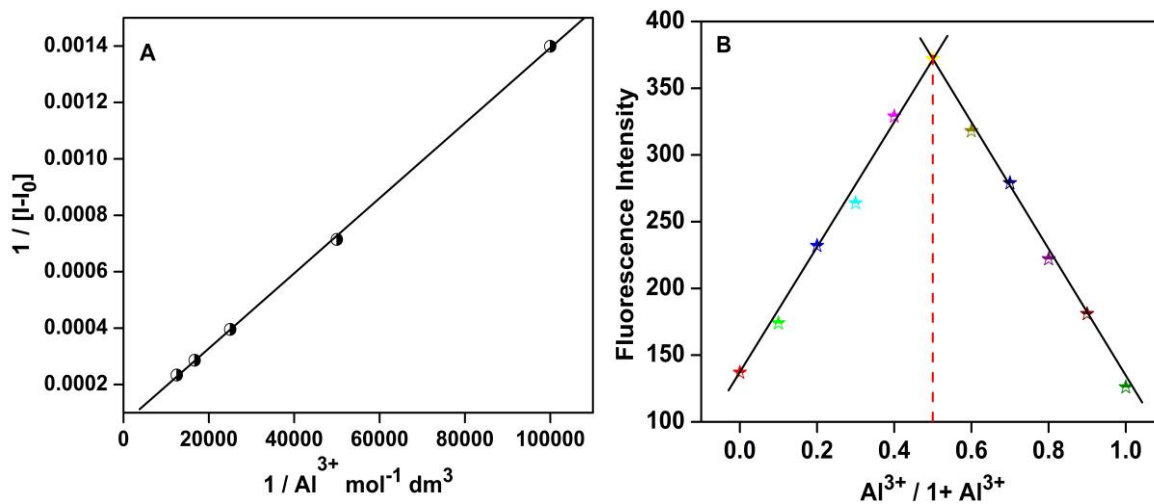

**Figure S7.** (A) Benesi-Hildebrand plot of  $1-\beta\text{-CD}$  complex solution assuming 1:1 binding with  $\text{Al}^{3+}$  ion pH =7.4 (B) Jobs plot, of the  $1-\beta\text{-CD}-\text{Al}^{3+}$  complex formation, made using fluorescence intensities.



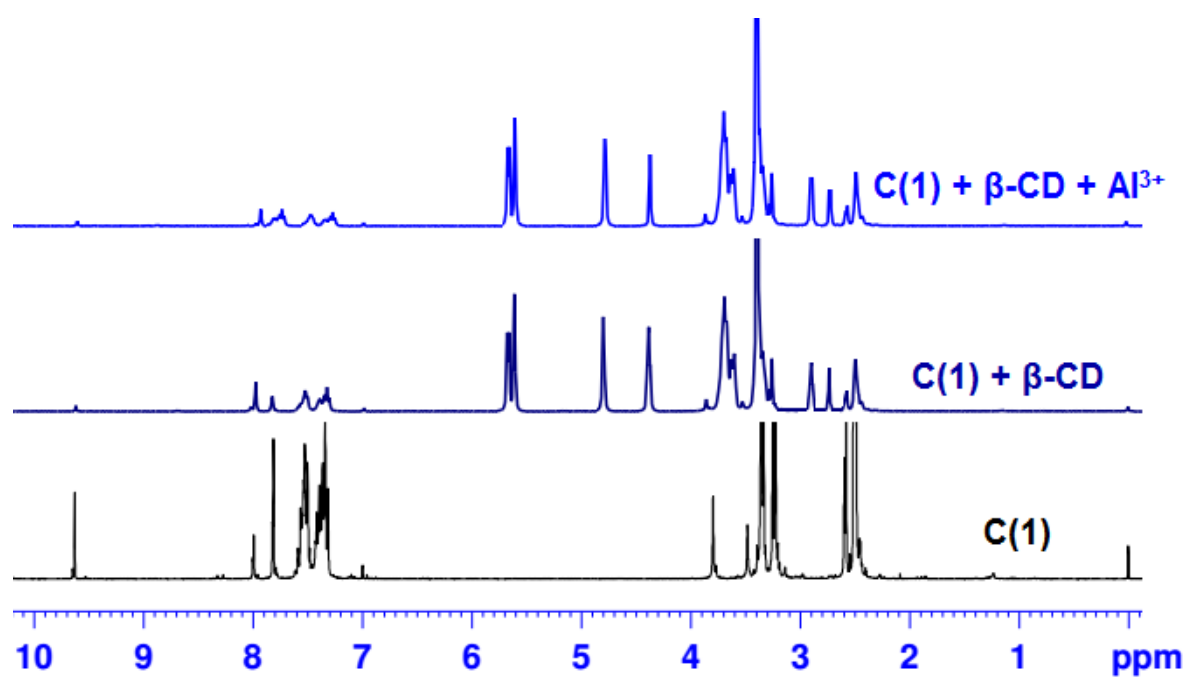

**Figure S8.** <sup>1</sup>H NMR Spectrum of Compound **1**, 1-β-CD and 1-β-CD with Al<sup>3+</sup> ion.
